1 **PISUM SATIVUM HAS NO COMPETITIVE RESPONSES TO NEIGHBOURS: A CASE STUDY IN**

2 **REPRODUCIBLE ECOLOGY**

3

4 Mariah L Mobley<sup>1,2</sup>, Audrey S Kruse<sup>3</sup>, and Gordon G McNickle<sup>1,2,\*</sup>

5

6 <sup>1</sup>Department of Botany and Plant Pathology, Purdue University, 915 W. State Street, West Lafayette, IN

7 47907, USA States

8 <sup>2</sup>Purdue Center for Plant Biology, Purdue University, 915W. State Street, West Lafayette, IN, 47907, USA.

9 <sup>3</sup>Department of Agronomy, Purdue University, 915 W. State Street, West Lafayette, IN 47907, USA

10 States

11

12 \* corresponding author: [gmcnickle@purdue.edu](mailto:gmcnickle@purdue.edu), phone: 765-494-4645

13

14 **KEYWORDS:** Pisum sativum, tragedy of the commons, Ideal free distribution, plant-plant competition,

15 replication crisis, below ground competition, meta-analysis.

16 **ABSTRACT:**

- 17 1. Many fields of science have experienced a replication crisis, where results from experiments  
18 with low statistical power published in the literature cannot be replicated. Ecology so far has not  
19 been drawn into this crisis, but there is no reason to think that this problem is absent in our  
20 field. Here, we originally attempted to replicate findings that showed pea (*Pisum sativum* L.)  
21 roots had strong differences in growth in the presence or absence of neighbours. Our original  
22 goal was just to develop a simple model system for studying how plant roots respond to  
23 competition from neighbours.
- 24 2. In an attempt to replicate previous findings, we performed four separate experiments with 480  
25 individual plants, across three years. Each time plants were grown in the full factorial  
26 combination of above and belowground competition. In addition, pea has been studied in  
27 similar experiments across six additional studies. Thus, we used meta-analysis to combine  
28 previous findings with our new findings.
- 29 3. We were unable to replicate previous findings, and in all four experiments plants grew the same  
30 whether there were neighbours or not. Despite variability in individual studies, meta-analysis  
31 revealed that pea has no growth responses to neighbours and grows the same whether there is  
32 or is not below ground competition.
- 33 4. *Synthesis:* Many other fields have gradually been drawn into a growing replication crisis, that is  
34 thought to be the result of low statistical power. Even though this is just one case study where a  
35 somewhat controversial result could not be reproduced, there is no reason to think ecology is  
36 immune from the replication crisis. We suggest that solutions developed in other fields might  
37 pre-emptively ward off similar problems. These include stricter cut-offs for statistical  
38 significance, a growing use of large replicated studies, and considering avenues for pre-  
39 registration of methods.

40 **INTRODUCTION:**

41           Many scientific fields have been experiencing a so-called replication crisis (Ioannidis, 2005,  
42 Saltelli and Funtowicz, 2017). The crisis is largely thought to stem from a plethora of statistically  
43 significant results in studies with low statistical power, that cannot be repeated in follow-up studies and  
44 thus represent type I errors (i.e. a failure to accept a true null hypothesis; Moonesinghe et al., 2007,  
45 Colquhoun, 2017). Does ecology suffer from a replication crisis? As far as we can tell, there has not been  
46 a major event, paper or movement in the field of ecology to spark a replication crisis the way there has  
47 been in other fields such as psychology (Pashler and Wagenmakers, 2012), medicine (Ioannidis, 2005)  
48 and economics (Camerer et al., 2016). Here, we describe a series of experiments designed to explore  
49 how one species, *Pisum sativum* (L.) responds to below ground neighbour competition. Our original goal  
50 was not replication, but rather to simply develop this as a model system for plant responses to  
51 neighbours. We chose the species and experimental designs based on results in the literature. However,  
52 over four separate experiments, we were unable to replicate published findings. Here, we reluctantly  
53 present this as a case study in reproducible ecology. However, first, we give a brief overview of the  
54 theory and hypotheses associated with plant root responses to neighbours that motivated our  
55 experiments.

56

57           One of the earliest and better known hypotheses about how roots should grow in the presence  
58 of neighbours was that roots should avoid neighbours and segregate in soil (Litav and Harper, 1967,  
59 Parrish and Bazzaz, 1976, Schenk et al., 1999). This hypothesis was mostly the result of verbal models  
60 that sought to explain high species diversity rather than theory that sought an understanding of how  
61 evolution by natural selection might shape a plant's response. Nevertheless, these verbal root  
62 segregation models created a two-part testable hypothesis: (i) plants alone simply respond to nutrient  
63 and water availability and produce the amount of roots required to adequately supply the shoot with

64 resources and; (ii) plants growing with neighbours are predicted to produce fewer roots (i.e. under-  
65 proliferate) in an attempt to seek root-free soil, and cede soil resources to competitors. The null  
66 hypothesis would be that plants grow the same, whether there are neighbours or not. Importantly, the  
67 segregation response requires some as yet unidentified mechanism to sense neighbour roots as  
68 different from self-roots (Falik et al., 2003, Gruntman and Novoplansky, 2004). A number of experiments  
69 have shown statistical evidence for this under-proliferation behaviour in plants (Schenk et al., 1999,  
70 Cahill et al., 2010), that is, these experiments have rejected the null hypothesis that plants have no  
71 response to neighbours and accepted the hypothesis that plants avoid neighbours.

72

73         Despite the longevity of the verbal root segregation hypothesis, and some empirical support,  
74 when evolutionary models were finally developed concerning best neighbour responses they almost all  
75 showed that segregation unlikely to be favoured by natural selection. Instead these models predicted  
76 the opposite of root segregation: plants should confront neighbours and try to pre-empt their nutrient  
77 uptake (Zhang et al., 1999, Gersani et al., 2001, Craine et al., 2005). To understand resource pre-  
78 emption, we suggest readers first consider a plant's best response to above ground competition: taller  
79 plants shade shorter plants, thereby pre-empting light access (Givnish, 1982, Falster and Westoby,  
80 2003). Indeed, many plants that are shaded can sense being over-topped and will plastically elongate, or  
81 over-proliferate, their stems to attempt to avoid this resource pre-emption (Ballare et al., 1987, Murphy  
82 and Dudley, 2007). Resource pre-emption of a below ground resource is analogous - though below  
83 ground resources are not as easily pre-empted as light - resource pre-emption takes the form of over-  
84 proliferation of roots when plants grow among neighbours compared to when plants grow alone. These  
85 models created another testable two-part hypothesis: (i) remains the same as above, but; (iii) plants are  
86 hypothesized to produce more roots (i.e. over-proliferate) in order to pre-empt resources from a  
87 neighbour. Like the segregation hypothesis, the pre-emption hypotheses requires the ability to

88 recognize neighbour roots as different from self-roots. Again, a number of studies also show statistical  
89 support for the over-proliferation behaviour in plants (Padilla et al., 2013, Smyeka and Herben, 2017),  
90 that is, these studies rejected the null hypothesis that plants have no response to neighbours and  
91 accepted the alternative that plants over-proliferate roots.

92

93         However, while both over- and under-proliferation hypotheses have experimental support,  
94 some plant species do not seem to exhibit any response to below ground competition (Litav and Harper,  
95 1967). That is, in these studies the null hypothesis of no response to neighbours was not rejected. A  
96 third set of null models have also been developed for such plants on the assumption that such plants  
97 may lack the ability to recognize neighbouring competitors (McNickle and Brown, 2014). Here, if plants  
98 have no responses to neighbours independent from nutrient depletion then the distribution of roots is  
99 predicted to be an ideal free distribution (IFD; sensu Fretwell and Lucas, 1969, Křivan et al., 2008). An  
100 IFD is often used to understand how non-territorial animals distribute themselves in relation to their  
101 food. Thus, despite the jargon, the IFD has a long history in foraging ecology, and connecting root  
102 growth to this long history is informative. The name IFD comes from the hypothesis that the distribution  
103 of foragers is ideal in the sense that individuals can 'know' resource distributions, and free in the sense  
104 that they are free to distribute themselves anywhere in relation to other individuals (e.g. no allelopathy  
105 or another plant behaviour akin to territoriality in animals; Schenk et al., 1999). An IFD type model  
106 explains the well-known behaviour of plants to place more roots in nutrient rich areas and fewer roots  
107 in nutrient poor areas (E.g. Hutchings and de Kroon, 1994, Hodge, 2004, Hodge, 2006), but predicts that  
108 nutrient depletion is the only mechanism of competition. Thus, rather than under- or over-proliferate  
109 roots in response to neighbours, an IFD type model creates a third two-part hypothesis: (i) remains the  
110 same as above, but; (iv) plants growing with neighbours should produce the same amount of roots as  
111 plants alone, providing the nutrient environment is equivalent on a per-plant basis. Again, there is also

112 experimental support for the IFD type root foraging model (McNickle and Brown, 2014, McNickle et al.,  
113 2020).

114

115         The three root competition models described above create three mutually exclusive alternative  
116 hypotheses. Importantly, these should be interpreted as mutually exclusive on the per-genotype basis,  
117 and not interpreted as mutually exclusive such that one model explains the entire plant kingdom.  
118 Indeed, it is entirely possible that different species use different responses, and there some evidence  
119 that this is the case (McNickle et al., 2016, Smyeka and Herben, 2017). Second, it also seems to be the  
120 case that different genotypes within a species might use different responses, and there is also evidence  
121 that this is the case (Murphy and Dudley, 2009, Semchenko et al., 2014). Third, perhaps responses are  
122 context dependent and the same genotype uses different responses across different contexts, and there  
123 is evidence that this too may be the case (Cahill et al., 2010, McNickle et al., 2016).

124

125         Many researchers (including us) seem to have converged on common pea (*Pisum sativum* L.) as  
126 a sort of model system for these root responses to neighbours. This is probably due to its ease of  
127 growth, and fast life cycle of 50-70 days. However, curiously, for this one species all three outcomes  
128 have been reported: One study found under-proliferation ((Chen et al., 2015) but see (McNickle, in  
129 press)); one study found over-proliferation ((O'Brien et al., 2005); but see (Laird and Aarssen, 2005, Hess  
130 and de Kroon, 2007)), and; (iii) two studies found the IFD no-response behaviour (Meier et al., 2013,  
131 Jacob et al., 2017). Given the mutually exclusive nature of the three theories, either pea responds  
132 differently across context, or genotype, or there may be seeds of a replication problem in these  
133 divergent results.

134

135 Here, we report the results of four separate experiments that sought to replicate pea root  
136 responses to competitors. In each experiment, peas were grown in the full factorial combination of root  
137 and shoot competition, but in completely different contexts (e.g. potting media, nutrient availabilities,  
138 times of year). We were unable to replicate previous findings of under- or over-proliferation and found  
139 that in all four experiments, pea exhibited the null IFD response. We combined our new results with  
140 previously published data in a meta-analysis. When combined the results across the literature  
141 overwhelmingly support the null IFD response for pea. We conclude by returning to the idea that this  
142 case study might represent seeds of a reproducibility crisis, and describe some approaches used in other  
143 fields to find a path forward.

144

## 145 **METHODS**

146 Not all studies of pea have used the same genotype. However, one study that reported  
147 neighbour avoidance (Gersani et al., 1998), and one study that found over-proliferation (O'Brien et al.,  
148 2005) both used the 'Little Marvel' cultivar. Thus, in our attempt to replicate these results, we also used  
149 *P. sativum* c.v. Little Marvel in all experiments.

150

151 Peas were grown in four different experiments that varied in context (i.e. soil type, nutrient  
152 addition and the time of year), but included the same four neighbour treatments (Fig 1). Each time, soil  
153 type and nutrient delivery were adjusted in ways that we hypothesized would bring us closer to  
154 replicating previous methods, and therefore results. The neighbour treatments were: 1) aboveground  
155 neighbour only; 2) below ground neighbour only; 3) no neighbour, and; 4) both above- and below  
156 ground neighbour. All experiments were performed in the same greenhouse room, and on the same  
157 bench of the Purdue University Lilly greenhouse complex, in West Lafayette, Indiana, USA (40°42'26.0"N,  
158 86°91'88.2"W) but took place over three years. The greenhouse was set to 25°C and supplementary

159 lighting from 600 watt high pressure sodium lights was on an 16:8 light:dark schedule for all four  
160 experiments. The same pot size was used in all experiments, with pots washed and sterilised between  
161 each experiment. In an attempt to minimize hypothesized volume constraints (Hess and de Kroon, 2007,  
162 Chen et al., 2015), we used very large 6.2 L pots designed for tree seedlings that were 40 cm deep and  
163 15 cm square at the top (Pot TP616, Stuewe & Sons Inc, Tanget, Oregon, USA). These pots are deeper  
164 than pea above ground height, and are extremely large for such a small plant. The planting media, and  
165 fertigation varied across the four experiments as described below. Pea is a climbing vine, thus to hold  
166 plants upright, 92 cm tall bamboo stakes were added for each plant (i.e. two per pot).

167

168         Testing among the hypotheses of under-proliferation, IFD and over-proliferation has been  
169 difficult, and plagued with methodological difficulties related to the study of roots hidden in soil (Laird  
170 and Aarssen, 2005, Hess and de Kroon, 2007, Mommer et al., 2008, Chen et al., 2015). Unfortunately,  
171 these problems do not have easy solutions because of the limitations of geometry and chemistry  
172 (McNickle, in press). To impose the competition treatments, we used the barrier method and added  
173 dividers either above- or below ground (Figure 1). This has the problem of confounding neighbour  
174 addition and rooting soil volume. However, we deemed this to be a true replication of previous work  
175 since this was the most common methodological approach in previous studies, and it is one of the only  
176 approaches that controls soil nutrients across treatments. We direct readers to McNickle (in press) for  
177 guidance on alternative experimental approaches to controls and their interpretation. Above ground,  
178 opaque dividers made of white corrugated plastic that were 45 cm tall and 15 cm across with 4 cm flaps  
179 to attach to the pot were constructed and placed across the middle of each pot. All pots in our  
180 experiments received dividers as a control for their effect on light reduction, and the placement of  
181 plants was adjusted such that both plants were on the same side of the divider if interaction above  
182 ground was to be permitted, or plants were on opposite sides of the divider if above ground interaction



183 was to be blocked (Figure 1). To minimize the effects of shading caused by the above ground dividers,  
184 and interaction among pots, replicate blocks were widely spaced on the greenhouse bench (~1m apart),  
185 and all pots were turned one-quarter turn to the east every day of the experiment. Below ground,  
186 dividers were constructed by cutting the rectangular pots in half, and nesting the two halves together  
187 (Figure 1). This created a situation where, as above, a barrier either allowed belowground interaction, or  
188 not. In all experiments, pots were arranged in a randomized block design with 15 replicates in all four  
189 experiments.

190

191 Each pot received two seeds five cm apart, with their location relative to the root or shoot  
192 barrier depending on treatment (Figure 1). Here, the alone treatment still included two plants, but there  
193 was a barrier between them both above and below ground. Prior to sowing, the soil was saturated with  
194 tap water, and freely watered each day until germination. After germination, plants were put on strict  
195 watering schedules that differed by experiment because the different potting media had different water  
196 holding capacities and are described below. In experiments 1, 3 and 4 (Table 1) fertilizer was dissolved  
197 into water and added with water on a pre-defined schedule. In experiment 2, only water was applied. In  
198 each case, the fertilizer was water soluble 24-8-16 of N-P-K solution that also contained micronutrients  
199 (Miracle-Gro All Purpose Plant Food, The Scotts Miracle-Gro Company, Marysville, Ohio, USA). The  
200 concentration and application of fertilizer varied by experiment in attempts to replicate previous  
201 findings. Major differences among the four separate experiments are summarised in Table 1, and  
202 described below.

203

#### 204 *Experiment 1, soil:*

205 Experiment one was performed in early spring from February 18, 2016 to April 28, 2016. The  
206 planting media was pure potting soil (propagation mix soil, Sungro Company, Agawam, Massachusetts,

207 USA). Each 6.2L pot was watered every other week with exactly 1L of water measured and poured into  
208 the pots (0.5L per half pot). The large pot size, and in particular the ratio of depth to surface area  
209 exposed to air, meant that soil did not completely dry between each watering. Pots were fertilized with  
210 a nutrient solution that was 0.25 g/L during weeks 3 and 6. All other experimental details were as above.  
211 Though we detail results below, this experiment failed to replicate published results, working from the  
212 hypothesis of different responses across different contexts, we adjusted the soil environment.

213

214 *Experiment 2, soil-gravel:*

215 Plants in experiment 1 grew extremely large and produced many fruits per individual. Thus, we  
216 hypothesized that if nutrients were highly available and not limiting to growth, plants may not  
217 experience competition because there were more nutrients than either plant could use (Casper and  
218 Jackson, 1997). Thus, to reduce nutrient availability and attempt to induce competition for limited  
219 resources, the planting media in this experiment was a 1:1 mixture of potting soil and calcined clay  
220 gravel. Experiment 2 was performed in early autumn from September 5, 2016 to November 14, 2016.  
221 Again, each 6.2L pot volume was watered every two weeks with exactly 1L of water. No fertilizer was  
222 applied. Unlike Experiment 1, the smaller plants in experiment 2 appeared to tip away from each other  
223 above ground because they failed to grasp the stake with their tendrils. In this experiment, bird netting  
224 (1.9 cm mesh, Bird Barricade, DeWitt Company, Sikeston, Missouri, USA) was wrapped loosely around  
225 the above ground portion of the experiment to keep plants within the vertical space above the pots. The  
226 netting was very fine and has undetectable effects on light levels (data not shown). All other  
227 experimental details were as above. Again, though we detail results below, this experiment failed to  
228 replicate published results, once again we hypothesized that context was the cause and adjusted the soil  
229 environment.

230

231 *Experiment 3, gravel:*

232           Gersani et al. (1998), O'Brien et al. (2005) and Chen et al. (2015) all used nutrient free potting  
233 media in their pea experiments, and applied nutrients exclusively during watering. Thus, we  
234 hypothesized that there might be something in the context of this nutrient delivery mechanism that led  
235 to their detection of neighbour responses. The planting media in experiment 3 was therefore pure  
236 calcined clay gravel (Turface Athletics MVP, PROFILE Products LLC, Buffalo Grove, Illinois, USA).  
237 Experiment three was performed in winter from December 6, 2017 to February 14, 2017. Plants were  
238 loosely tied to the stakes with stretch tie tape. The gravel did not hold water well, and so these plants  
239 were watered once each week, again by measuring exactly 1L of water per pot, however in this  
240 experiment plants were fertigated every week because the gravel did not hold water well. The fertilizer  
241 concentration was 0.5 g/L, and supplied during weeks 3, 5, 7, and 9 of growth. All other experimental  
242 details were as above. Though we detail results below, this experiment also failed to replicate published  
243 results, again we hypothesized that context was the cause and adjusted the soil environment one last  
244 time.

245

246 *Experiment 4, vermiculite:*

247           While Gersani et al. (1998) and O'Brien et al. (2005) indeed used nutrient free potting media and  
248 nutrients supplied only in aqueous solution, they used vermiculite in both experiments, not gravel. Thus,  
249 our final hypothesis was that there was something unique about the context of growing in vermiculite  
250 compared to gravel and/or soil that might have led to their results. Thus, the planting media in  
251 experiment 4 was pure vermiculite (Coarse Vermiculite, Perlite Vermiculite Packaging Industries, Inc.,  
252 North Bloomfield, Ohio, USA), which contained no nutrients. Experiment four was performed in early  
253 autumn from September 6, 2018 to November 15. Plants were loosely tied to the stakes with stretch tie  
254 tape. Again, all nutrients were supplied by liquid fertilizer using the same water-fertigation schedule as

255 in experiment 3. The other experimental details were as above. After failing to repeat published results  
256 four times, we attempted no further experiments.

257

### 258 *Harvest*

259 In all four experiments, after 10 weeks of growth the peas were harvested. The leaves, shoots,  
260 pods, and roots were collected separately. Roots were washed on a 2mm sieve. As expected,  
261 intermingled roots of neighbouring plants could not be separated. Tissues were dried at 60°C to  
262 constant mass, and then weighed.

263

### 264 *Analysis*

265 Since roots of interacting neighbours typically cannot not be separated, there are two  
266 approaches to dealing with this. One is to divide the total mass of plants with neighbours by 2 and  
267 compare this to the mass of one plant grown alone. However, this does not control for size asymmetry  
268 among the two interacting plants (Laird and Aarssen, 2005). The other approach, is to sum the biomass  
269 of two plants grown alone and compare this to the mass of the two neighbour plants across all  
270 treatments, thereby controlling for size asymmetry whether or not the plants actually interacted  
271 (McNickle and Brown, 2014). We took this second approach. Data from each experiment was analysed  
272 using GLMM with treatment as a fixed effect, and block as a random effect using lme4 (Bates, 2007) in  
273 the R statistical environment. Plants grew very differently in different soil contexts, but we were not  
274 interested in comparing soil contexts. Rather we viewed each experiment was an independent attempt  
275 at replicating a previously published result. Therefore, we analysed each experiment individually. For  
276 each experiment we examined leaf, stem, root, fruit and shoot (i.e. leaf + stem) biomass of both plants  
277 summed together as separate response variables. All biomass data was  $\log(x + c)$  transformed where  
278  $c = 0.01$ .

279

280 *Meta-analysis*

281           Once it became clear that we were unable to replicate published results of under- or over-  
282 proliferation, we also sought to combine our four experiments with existing results in the literature.  
283 From the known studies in the literature, we extracted the mean root production with and without  
284 neighbours, and the mean pod production with and without neighbours, as well as the standard  
285 deviations. Some studies imposed a second treatment, and these means are recorded separately  
286 resulting in multiple data points for the following studies: (i) O'Brien et al. (2005) crossed the neighbour  
287 addition treatment with low and high nutrient addition; (ii) Chen et al. (2015) manipulated volume (6  
288 levels) and nutrient concentration (3 levels with neighbour controls) simultaneously and; (iii) McNickle  
289 et al. (2020) had plants with and without mycorrhizae. The supplementary data details the different  
290 treatments. Though, Gersani et al. (1998) used pea, they used a split root approach. In the experiment  
291 one pot had neighbours, while the other had neighbour-free soil. Given that all other studies compared  
292 neighbours that shared soil, to plants alone that did not share soil, we did not know how to compare the  
293 results of Gersani et al. (1998) to the others, and therefore do not include it in the meta-analysis.

294

295           When raw data were available (Chen et al., 2015, McNickle unpubl., McNickle et al., 2020),  
296 means and standard deviations were calculated from the data for alone and with neighbours, within  
297 each additional treatment if present. When data were not available (O'Brien et al., 2005, Meier et al.,  
298 2013, Jacob et al., 2017), means and standard deviations were extracted from the figures using imageJ  
299 by calibrating the length measurement tool to the scale of the y-axis. Two studies only collected root  
300 data and did not have pod data, and these two studies also did not report any estimate of variation  
301 around the reported means (Meier et al., 2013, Jacob et al., 2017). In addition, we had access to an old  
302 pilot experiment from our own research that also used the 'Little Marvel' cultivar but was not followed

303 up on (McNickle unpubl.; Supplementary information, Table S1, Figure S1). We include those data here  
304 as well.

305

306 To account for potential methodological differences among studies, we used a log response  
307 ratio ( $lnRR$ ) as our test statistic (Hedges et al., 1999) calculated according to:

$$lnRR = \ln\left(\frac{\bar{X}_n}{\bar{X}_a}\right), \quad eqn 1$$

308 where  $\bar{X}_n$  is the mean response variable in the presence of a neighbour, and  $\bar{X}_a$  is the mean response  
309 variable when grown alone. By constructing the ratio this way, it will be negative in the case of under-  
310 proliferation, positive in the case of over-proliferation, and zero in the case of an IFD response. The  
311 standard deviation of  $lnRR$  is given by:

$$SD_{RR} = \sqrt{\frac{SD_n^2}{n\bar{X}_n^2} + \frac{SD_a^2}{n\bar{X}_a^2}}, \quad Eqn 2$$

312 where  $n$  is the sample size in the study,  $SD_n$  is the standard deviation of the neighbour response, and  
313  $SD_a$  is the standard deviation of the alone response (Lajeunesse, 2015). We calculated  $lnRR$  for  
314 individual root biomass, and for lifetime seed yield.

315

316 In addition to the debate about root responses to neighbours, there is debate about  
317 methodological controls. Specifically, how and whether to control nutrients in neighbour treatments.  
318 One study (Chen et al., 2015) in the meta-analysis has been interpreted two different ways to draw very  
319 different conclusions. Chen et al (2015) argued that controlling pot volume was more important than  
320 nutrients in the study of plant competition, and made planned comparisons that confounded soil  
321 nutrient concentration with neighbour addition while controlling for pot volume. Analysis of these six  
322 planned comparisons concluded that plants were under-proliferating roots. McNickle et al (In press)  
323 argued that nutrients were important in the study of below ground plant competition and used the

324 same data to make three planned comparisons that confounded pot volume with neighbours but  
325 controlled soil nutrients. This analysis concluded plants were ignoring neighbours and exhibited the IFD  
326 behaviour. To deal with the fact that these two interpretations are alternative theoretical research  
327 programmes (sensu Lakatos, 1978) which cannot both be true, we performed the meta-analysis data  
328 both ways as if there were two distinct literatures and leave the interpretation to readers depending on  
329 their world view (sensu Brown, 2001).

330

## 331 **RESULTS**

### 332 *Experiments 1-4*

333         Though plants grew differently in each of our four experiments, plants produced the same pod  
334 mass (Fig 2 a-d), and root mass (Fig 2 e-h) regardless of whether there was a neighbour above or below  
335 ground in every experiment (Table 2). Thus, we were unable to replicate previous findings of either  
336 neighbour avoidance, or root over-proliferation despite four different experiments that included 480  
337 individual plants across 3 years. We conclude that the results of all four experiments support the IFD  
338 hypothesis. Because of previously expressed concerns about pot volume effects (Hess and de Kroon,  
339 2007, Chen et al., 2015), we also note that since all plants with root barriers were in pots of half the  
340 volume of all plants without root barriers, these results mean that potting volume also had no effect on  
341 plant growth in any of our experiments.

342

343         Most root based theories described here make no specific hypotheses about leaf and stem  
344 responses, though an implicit assumption is probably that there are no shoot differences among  
345 treatments. We analysed leaf and stem tissue pools separately (Fig 3). Only two significant differences  
346 arose at the  $\alpha = 0.05$  significance level (Table 2). First, in experiment 2, plants that experienced root  
347 competition only, produced significantly more stem biomass than plants that experienced shoot

348 competition only (Fig 3B). Second, in experiment 3, plants that experienced no competition produced  
349 significantly more leaf biomass than plants that experienced root competition only (Fig 3G). Though  
350 these differences were significant in the statistical sense, they were not biologically large differences. In  
351 addition, when leaf and stem mass are summed as the more commonly analysed “shoot” biomass, the  
352 significance disappeared (Table 2). Given that: (i) most root theories make no specific shoot hypotheses;  
353 (ii) the fact that the biological differences were slight (Fig 3B, G), and; (iii) this is a paper partially about  
354 type I errors, we do not make very much of these differences. Indeed, Table 2 has exactly 20  
355 independent statistical tests. With  $\alpha = 0.05$ , on average we would expect one spurious significant  
356 result, and two spurious results would not be out of the question. A simple Bonferroni correction  
357 reduces the significance cut-off to  $\alpha = 0.0025$ , and erases all statistical significance.

358

### 359 *Meta-analysis*

360 The meta-analysis included 14 or 17 estimates of root and fruit log response ratios from 224 or  
361 299 replicate alone and with neighbour pairs depending on how Chen et al. (2015) is included. When all  
362 available results were combined the consensus among studies was that pea has no response to  
363 neighbours, and that root and pod growth supports the null IFD model (Fig 4). Interestingly, this was the  
364 case under either interpretation of the Chen et al (2015) data.

365

### 366 **DISCUSSION**

367 Many scientific fields have been experiencing a reproducibility crisis (Ioannidis, 2005, Saltelli and  
368 Funtowicz, 2017). Our understanding is that this reproducibility crisis began in psychology in part when a  
369 study reported evidence for psychic perception in humans (Bem, 2011, Pashler and Wagenmakers,  
370 2012). Not surprisingly, this result was quickly criticised (Wagenmakers et al., 2011), and the result was  
371 not repeated in a subsequent study (Galak et al., 2012). The mounting concerns about reproducibility



372 led some in psychology to wonder how often any results could be repeated, and the crisis culminated in  
373 a large collaborative effort to try and reproduce 100 published results. This effort found that only 36% of  
374 these 100 previously published results were reproducible (Aarts et al., 2015). The cause was largely  
375 blamed on low statistical power, and a culture that values novelty over replication (Hunter, 2001,  
376 Moonesinghe et al., 2007, Stanley et al., 2018). As far as we can tell, ecology has not been fully drawn  
377 into the replication crisis like other fields such as psychology (Pashler and Wagenmakers, 2012),  
378 medicine (Ioannidis, 2005) and economics (Camerer et al., 2016). However, others have noted that true  
379 replications are relatively rare in ecology (Belovsky et al., 2004) and statistical power to detect all but  
380 the largest effect sizes can be low in ecological experiments (Steidl et al., 1997). It is likely that there is  
381 some level of non-reproducibility in ecology.

382

383 In addition, to the replication crisis, there is also the problem of *p*-hacking, which can enlarge  
384 the number of type-I errors in the published literature. This *p*-hacking occurs when a just barely  
385 insignificant result at the  $\alpha = 0.05$  level is nudged across the significance line through slight  
386 adjustments in the statistical approach (Bruns and Ioannidis, 2016). Without *p*-hacking, and with  
387 statistical significance set arbitrarily at  $\alpha = 0.05$ , we would expect one in twenty published results in the  
388 literature which have not been replicated to be type-I errors where a true null hypothesis was  
389 erroneously rejected. However, in the presence of *p*-hacking, the number of published un-replicated  
390 type-I errors can be significantly higher. Indeed, as in many fields there is evidence of *p*-hacking in the  
391 broader field of biology as a whole (Head et al., 2015). The presence of *p*-hacking was also thought to be  
392 part of the reason that only 35% of the 100 psychology studies in the literature were reproducible (Aarts  
393 et al., 2015).

394

395           Here, we used a debated problem of how plants respond to neighbouring roots framed as a case  
396 study in reproducible ecology. Different research groups had developed three mutually exclusive  
397 hypotheses, two of which had been supported by the growth behaviour of a single species and a single  
398 genotype in the literature (Gersani et al., 1998, O'Brien et al., 2005). Our original goal was simply to  
399 develop a model system for exploring pea responses to neighbours across contexts. We began with an  
400 assumption that the published results were 'true', and then worked from the hypothesis that the  
401 difference in results were caused by different contexts. As such, we tried a number of different soil  
402 types and nutrient availabilities, all seeking to replicate previous methods. Our failure to replicate  
403 published results (Figure 2, 3) combined with meta-analysis of all available studies (Fig 4) show that the  
404 best current evidence is that pea exhibits the null IFD response, and that previous findings may have  
405 simply been type I errors made at the  $\alpha = 0.05$  level. This is true whether one views nutrients as  
406 important (McNickle, in press) or unimportant (Chen et al., 2015) to plant competition below ground  
407 (Fig 4).

408  
409           We stress that our conclusion that common pea exhibits an IFD response should be confined to  
410 pea, and possibly even to the 'Little Marvel' cultivar. This conclusion should not be extended to the  
411 entire plant kingdom. The hypothesis that different species and different genotypes may have any of the  
412 three theoretical root responses (under- or over-proliferation, or IFD) is not falsified through the study  
413 of one species *P. sativum* and one cultivar Little Marvel. Indeed, surprisingly few species have been  
414 assayed for their response to neighbouring plants, with (strangely) almost half of assayed species  
415 coming from the fabaceae family (Smyeka and Herben, 2017). In addition, though different responses  
416 across different contexts do not seem to have been the cause for variation in pea responses in the  
417 literature, this does not refute the hypothesis that other species may have different responses among  
418 different contexts (Cahill et al., 2010, McNickle et al., 2016). Much more work that includes replication

419 both within and among species, and within and among genotypes is needed to draw general conclusions  
420 across the hundreds of thousands of species in the plant kingdom (Joppa et al., 2011).

421  
422 The studies included in our meta-analysis used on average of ~13 replicates but included as few  
423 as 4 (Jacob et al., 2017) replicates, and as many as 25 (Chen et al., 2015). Thus, each study varied  
424 significantly in its statistical power (where statistical power is defined as 1 minus the probability of  
425 making a type II error; accepting a false null). None of the published studies (including our experiments 1  
426 – 4) had the statistical power to detect small or medium effect sizes with a type I error rate of one in  
427 twenty, and a type II error rate of one in five (Fig 5A). Indeed, even with 224 replicates across all studies  
428 in the meta-analysis (Fig 4), this just barely would allow for the statistical power to detect small effect  
429 sizes (Fig 5A). Thus, as ultimately suspected in the failure to replicate previously published results in  
430 psychology, we conclude the non-reproducibility of the pea under- or over-proliferation behaviour was  
431 due to low statistical power.

432  
433 This is just one case study in ecology, but there are other examples. One in an adjacent field was  
434 the idea that there should be a trade-off in a plant's ability to precisely place roots into nutrient rich  
435 zones of soil, and the ability of a plant to explore large spatial scales of soil volume (Campbell et al.,  
436 1991). This scale-precision trade-off hypothesis emerged from a study that with ten species but only five  
437 replicates per species, and shaped root foraging research for decades (Hodge, 2004, Hodge, 2006).  
438 Ultimately, meta-analysis revealed that there was not really any evidence for this scale-precision trade-  
439 off, and that the first paper was likely just a low statistical power type-I error (Kembel and Cahill, 2005,  
440 de Kroon and Mommer, 2006, Kembel et al., 2008) but see (Grime, 2007). It is not our goal to review  
441 every such case of a failure to replicate previously published results across the ecology literature, but  
442 these two involving plant roots are unlikely to be the only such examples across the field.

443

444           Given that a few results were enough to spark a replication crises in other fields (Pashler and  
445 Wagenmakers, 2012, Saltelli and Funtowicz, 2017), it is worth considering how other fields have  
446 approached a solution. One of the simplest solutions is to make data publically available in data  
447 repositories, and ecologists seem to have largely embraced this approach already judging from the  
448 requirements of most journals in our field. In addition, some fields approach the problem with very high  
449 power to detect small effect sizes. For example, sample sizes in medicine are often in the thousands.  
450 Here, human lives literally depend on the ability to detect even small effect sizes. However, this may not  
451 be a reasonable approach in ecology. It is one thing to administer a medical intervention to thousands of  
452 people who then go off and live their lives during the experiment, and another to care for thousands of  
453 plants in a greenhouse, or survey millions of hectares of forest.

454

455           As another example, fields also differ in the cut-off they use for statistical significance. Most  
456 scientific fields, including ecology, use a statistical significance cut-off of  $\alpha = 0.05$ , or a type I error rate  
457 of one in twenty. In the language of confidence intervals, where a standard deviation is denoted by the  
458 symbol sigma, this statistical cut-off is also sometimes called two-sigma. However, in physics a five-  
459 sigma level of significance, which is  $\alpha = 0.0000003$ , or a type I error rate of one in 3.5 million is  
460 required for a discovery (E.g. the detection of gravity waves: Abbott et al., 2016). Alternatively, three  
461 sigma, which is  $\alpha = 0.0027$ , or an error rate of one in about 370, is taken as weak evidence that a  
462 phenomena might exist (Lyons, 2013). Importantly, either two, three or five sigma has no theoretical  
463 basis, it is just a convenient cut-off based on a field's willingness to accept error type I error (Colquhoun,  
464 2017). Perhaps five-sigma is unrealistic for ecology (Fig 5c), but when we look through our own past  
465 published results, three-sigma seems frequently achievable, and perhaps an error rate of one in 370 is  
466 preferable to an error rate of one in twenty. For context, in the study of pea roots, a sample sizes of

467  $n=30$  to  $n=60$  would be able to detect both large and medium effect sizes at sigma three (Fig 5B).  
468 Furthermore, in the context of experiments 1-4, the somewhat ambiguous leaf and stem effect sizes  
469 would no longer be “statistically significant” under three-sigma.

470

471 Another solution is a culture of science that values replication studies, and ecologists seem  
472 increasingly open to such replication. Indeed, replication of studies allows for meta-analysis, which has  
473 been an increasingly powerful tool in ecology to resolve large questions and problems (E.g. Cardinale et  
474 al., 2007, Kembel et al., 2008, Vellend et al., 2013). In addition, large scale experiments that are  
475 replicated by independent groups across space and time are becoming increasingly common in ecology.  
476 Examples of these include the plethora of Free Air Carbon dioxide Enrichment studies (Norby and Zak,  
477 2011), networks of large atmospheric eddy covariance towers (Luyssaert et al., 2007), the National  
478 Science Foundation of the USA’s National Ecological Observatory network (NEON;  
479 <https://www.neonscience.org/>). Ecologists are also forming increasingly large networks of studies using  
480 common methods such as nutrient net (<https://nutnet.org/>), drought net ([https://drought-  
482 net.colostate.edu/](https://drought-<br/>481 net.colostate.edu/)), the global biodiversity initiative (<https://www.gfbinitiative.org/>) or the Smithsonian  
483 ForestGeo network (<https://forestgeo.si.edu/>).

483

484 Finally, pre-registration has been one solution increasingly adopted in other fields (Van 't Veer  
485 and Giner-Sorolla, 2016). Pre-registration requires researchers to detail and publish their hypotheses,  
486 methods and analyses before the experiments are performed. Pre-registration can potentially protect  
487 against  $p$ -hacking, and post-hoc data exploration. We are unaware of any wide-spread attempts at pre-  
488 registration in ecology.

489

490 *Conclusion*

491           A small number of plant ecologists have been arguing about plant root responses to neighbours  
492 for several decades, but only sporadically performing experiments to advance the debate. Three  
493 mutually exclusive theories have been devised: (i) roots should avoid neighbours and under-proliferate  
494 roots in response to competition; (ii) roots should confront neighbours and over-proliferate in response  
495 to competition, and; (iii) roots cannot recognize neighbours and do not respond independent from their  
496 responses to nutrients forming an IFD of roots in soil. Published studies in the literature showed support  
497 for all three theories with the common pea. We were unable to replicate previous findings of over-  
498 proliferation, or under-proliferation in four separate experiments. Combined with meta-analysis, we  
499 conclude that pea exhibits the IFD response. There is a growing recognition that many fields in science  
500 have a reproducibility problem. This study of one problem in plant ecology may not represent a  
501 replication crisis in ecology. Yet, it highlights the risk of making conclusions which are not replicated, and  
502 independently verifiable. Following success in other fields of science, we recommend ecologists consider  
503 a more stringent statistical significance cut-off, that ecologists be more sceptical of results that have not  
504 been independently replicated, and that the field explores pre-registration of experimental design.

505

#### 506 **ACKNOWLEDGEMENTS**

507 This work was supported by the USDA National Institute of Food and Agriculture Hatch project 1010722.

508 The authors declare no conflicts of interest.

509

#### 510 **AUTHOR CONTRIBUTIONS**

511 GGM and MM designed the experiments. MM performed experiments 1,2 and 4 and statistical analyses.

512 AK performed experiment 3, and statistical analyses. MM drafted the initial manuscript, and all authors

513 contributed to revisions.

514 REFERENCES

- 515 Aarts, A. A., Anderson, J. E., Anderson, C. J., Attridge, P. R., Attwood, A., Axt, J., Babel, M., Bahnik, S.,  
516 Baranski, E., Barnett-Cowan, M., Bartmess, E., Beer, J., Bell, R., Bentley, H., Beyan, L., Binion, G.,  
517 Borsboom, D., Bosch, A., Bosco, F. A., Bowman, S. D., Brandt, M. J., Braswell, E., Brohmer, H.,  
518 Brown, B. T., Brown, K., Bruning, J., Calhoun-Sauls, A., Callahan, S. P., Chagnon, E., Chandler, J.,  
519 Chartier, C. R., Cheung, F., Christopherson, C. D., Cillessen, L., Clay, R., Cleary, H., Cloud, M. D.,  
520 Cohn, M., Cohoon, J., Columbus, S., Cordes, A., Costantini, G., Alvarez, L. D. C., Cremata, E.,  
521 Crusius, J., DeCoster, J., DeGaetano, M. A., Della Penna, N., den Bezemer, B., Deserno, M. K.,  
522 Devitt, O., Dewitte, L., Dobolyi, D. G., Dodson, G. T., Donnellan, M. B., Donohue, R., Dore, R. A.,  
523 Dorough, A., Dreber, A., Dugas, M., Dunn, E. W., Easey, K., Eboigbe, S., Eggleston, C., Embley, J.,  
524 Epskamp, S., Errington, T. M., Estel, V., Farach, F. J., Feather, J., Fedor, A., Fernandez-Castilla, B.,  
525 Fiedler, S., Field, J. G., Fitneva, S. A., Flagan, T., Forest, A. L., Forsell, E., Foster, J. D., Frank, M. C.,  
526 Frazier, R. S., Fuchs, H., Gable, P., Galak, J., Galliani, E. M., Gampa, A., Garcia, S., Gazarian, D.,  
527 Gilbert, E., Giner-Sorolla, R., Glockner, A., Goellner, L., Goh, J. X., Goldberg, R., Goodbourn, P. T.,  
528 Gordon-McKeon, S., Gorges, B., Gorges, J., Goss, J., Graham, J., et al. (2015) Estimating the  
529 reproducibility of psychological science. *Science*, **349**, 8.
- 530 Abbott, B. P., Abbott, R., Abbott, T. D., Abernathy, M. R., Acernese, F., Ackley, K., Adams, C., Adams, T.,  
531 Addesso, P., Adhikari, R. X., Adya, V. B., Affeldt, C., Agathos, M., Agatsuma, K., Aggarwal, N.,  
532 Aguiar, O. D., Aiello, L., Ain, A., Ajith, P., Allen, B., Allocca, A., Altin, P. A., Anderson, S. B.,  
533 Anderson, W. G., Arai, K., Arain, M. A., Araya, M. C., Arceneaux, C. C., Areeda, J. S., Arnaud, N.,  
534 Arun, K. G., Ascenzi, S., Ashton, G., Ast, M., Aston, S. M., Astone, P., Aufmuth, P., Aulbert, C.,  
535 Babak, S., Bacon, P., Bader, M. K. M., Baker, P. T., Baldaccini, F., Ballardín, G., Ballmer, S. W.,  
536 Barayoga, J. C., Barclay, S. E., Barish, B. C., Barker, D., Barone, F., Barr, B., Barsotti, L., Barsuglia,  
537 M., Barta, D., Bartlett, J., Barton, M. A., Bartos, I., Bassiri, R., Basti, A., Batch, J. C., Baune, C.,  
538 Bavigadda, V., Bazzan, M., Behnke, B., Bejger, M., Belczynski, C., Bell, A. S., Bell, C. J., Berger, B.  
539 K., Bergman, J., Bergmann, G., Berry, C. P. L., Bersanetti, D., Bertolini, A., Betzwieser, J.,  
540 Bhagwat, S., Bhandare, R., Bilenko, I. A., Billingsley, G., Birch, J., Birney, R., Birnholtz, O., Biscans,  
541 S., Bisht, A., Bitossi, M., Biwer, C., Bizouard, M. A., Blackburn, J. K., Blair, C. D., Blair, D. G., Blair,  
542 R. M., Bloemen, S., Bock, O., Bodiya, T. P., Boer, M., Bogaert, G., Bogan, C., Bohe, A., Bojtos, P.,  
543 Bond, C., et al. (2016) Observation of gravitational waves from a binary black hole merger.  
544 *Physical Review Letters*, **116**, 16.
- 545 Ballare, C. L., Sanchez, R. A., Scopel, A. L., Casal, J. J. & Ghera, C. M. (1987) Early detection of neighbor  
546 plants by phytochrome perception of spectral changes in reflected sunlight. *Plant Cell and*  
547 *Environment*, **10**, 551-557.
- 548 Bates, D. M. (2007) Linear mixed model implementation in lme4.
- 549 Belovsky, G. E., Botkin, D. B., Crowl, T. A., Cummins, K. W., Franklin, J. F., Hunter, M. L., Joern, A.,  
550 Lindenmayer, D. B., MacMahon, J. A., Margules, C. R. & Scott, J. M. (2004) Ten suggestions to  
551 strengthen the science of ecology. *Bioscience*, **54**, 345-351.
- 552 Bem, D. J. (2011) Feeling the future: Experimental evidence for anomalous retroactive influences on  
553 cognition and affect. *Journal of Personality and Social Psychology*, **100**, 407-425.
- 554 Brown, J. S. (2001) Ngongas and ecology: On having a worldview. *Oikos*, **94**, 6-16.
- 555 Bruns, S. B. & Ioannidis, J. P. A. (2016) P-curve and p-hacking in observational research. *PLOS ONE*, **11**,  
556 e0149144.
- 557 Cahill, J. F., Jr., McNickle, G. G., Haag, J. J., Lamb, E. G., Nyanumba, S. M. & St. Clair, C. C. (2010) Plants  
558 integrate information about nutrients and neighbors. *Science*, **328**, 1657-.
- 559 Camerer, C. F., Dreber, A., Forsell, E., Ho, T.-H., Huber, J., Johannesson, M., Kirchler, M., Almenberg, J.,  
560 Altmejd, A., Chan, T., Heikensten, E., Holzmeister, F., Imai, T., Isaksson, S., Nave, G., Pfeiffer, T.,

- 561 Razen, M. & Wu, H. (2016) Evaluating replicability of laboratory experiments in economics.  
562 *Science*, **351**, 1433-1436.
- 563 Campbell, B. D., Grime, J. P. & Mackey, J. M. L. (1991) A trade-off between scale and precision in  
564 resource foraging. *Oecologia*, **87**, 532-538.
- 565 Cardinale, B. J., Wright, J. P., Cadotte, M. W., Carroll, I. T., Hector, A., Srivastava, D. S., Loreau, M. &  
566 Weis, J. J. (2007) Impacts of plant diversity on biomass production increase through time  
567 because of species complementarity. *Proceedings of the National Academy of Sciences of the*  
568 *United States of America*, **104**, 18123-18128.
- 569 Casper, B. B. & Jackson, R. B. (1997) Plant competition underground. *Annual Review of Ecology and*  
570 *Systematics*, **28**, 545-570.
- 571 Chen, B. J. W., Daring, H. J., Vermeulen, P. J., de Kroon, H., Poorter, H. & Anten, N. P. R. (2015)  
572 Corrections for rooting volume and plant size reveal negative effects of neighbour presence on  
573 root allocation in pea. *Functional Ecology*, **29**, 1383-1391.
- 574 Colquhoun, D. (2017) The reproducibility of research and the misinterpretation of *p*-values. *Royal*  
575 *Society Open Science*, **4**, 171085.
- 576 Craine, J. M., Fargione, J. & Sugita, S. (2005) Supply pre-emption, not concentration reduction, is the  
577 mechanism of competition for nutrients. *New Phytologist*, **166**, 933-940.
- 578 de Kroon, H. & Mommer, L. (2006) Root foraging theory put to the test. *Trends in Ecology & Evolution*,  
579 **21**, 113-116.
- 580 Falik, O., Reides, P., Gersani, M. & Novoplansky, A. (2003) Self/non-self discrimination in roots. *Journal*  
581 *of Ecology*, **91**, 525-531.
- 582 Falster, D. S. & Westoby, M. (2003) Plant height and evolutionary games. *Trends in Ecology & Evolution*,  
583 **18**, 337-343.
- 584 Fretwell, S. D. & Lucas, H. L. (1969) On territorial behavior and other factors influencing habitat  
585 distribution in birds. *Acta Biotheoretica*, **19**, 16-36.
- 586 Galak, J., LeBoeuf, R. A., Nelson, L. D. & Simmons, J. P. (2012) Correcting the past: Failures to replicate  
587 psi. *Journal of Personality and Social Psychology*, **103**, 933-948.
- 588 Gersani, M., Abramsky, Z. & Falik, O. (1998) Density-dependent habitat selection in plants. *Evolutionary*  
589 *Ecology*, **12**, 223-234.
- 590 Gersani, M., Brown, J. S., O'Brien, E. E., Maina, G. M. & Abramsky, Z. (2001) Tragedy of the commons as  
591 a result of root competition. *Journal of Ecology*, **89**, 660-669.
- 592 Givnish, T. J. (1982) On the adaptive significance of leaf height in forest herbs. *American Naturalist*, **120**,  
593 353-381.
- 594 Grime, J. P. (2007) The scale-precision trade-off in spacial resource foraging by plants: Restoring  
595 perspective. *Annals of Botany*, **99**, 1017-1021.
- 596 Gruntman, M. & Novoplansky, A. (2004) Physiologically mediated self/non-self discrimination in roots.  
597 *Proceedings of the National Academy of Sciences of the United States of America*, **101**, 3863-  
598 3867.
- 599 Head, M. L., Holman, L., Lanfear, R., Kahn, A. T. & Jennions, M. D. (2015) The extent and consequences  
600 of p-hacking in science. *PLOS Biology*, **13**, e1002106.
- 601 Hedges, L. V., Gurevitch, J. & Curtis, P. S. (1999) The meta-analysis of response ratios in experimental  
602 ecology. *Ecology*, **80**, 1150-1156.
- 603 Hess, L. & de Kroon, H. (2007) Effects of rooting volume and nutrient availability as an alternative  
604 explanation for root self/non-self discrimination. *Journal of Ecology*, **95**, 241-251.
- 605 Hodge, A. (2004) The plastic plant: Root responses to heterogeneous supplies of nutrients. *New*  
606 *Phytologist*, **162**, 9-24.
- 607 Hodge, A. (2006) Plastic plants and patchy soils. *Journal of Experimental Botany*, **57**, 401-411.
- 608 Hunter, J. E. (2001) The desperate need for replications. *Journal of Consumer Research*, **28**, 149-158.



- 609 Hutchings, M. J. & de Kroon, H. (1994) Foraging in plants - the role of morphological plasticity in  
610 resource acquisition. *Advances in Ecological Research*, Vol 25, **25**, 159-238.
- 611 Ioannidis, J. P. A. (2005) Why most published research findings are false. *PLOS Medicine*, **2**, e124.
- 612 Jacob, C. E., Tozzi, E. & Willenborg, C. J. (2017) Neighbour presence, not identity, influences root and  
613 shoot allocation in pea. *PLOS ONE*, **12**, e0173758.
- 614 Joppa, L. N., Roberts, D. L. & Pimm, S. L. (2011) How many species of flowering plants are there?  
615 *Proceedings of the Royal Society B: Biological Sciences*, **278**, 554-559.
- 616 Kembel, S. W. & Cahill, J. F. (2005) Plant phenotypic plasticity belowground: A phylogenetic perspective  
617 on root foraging trade-offs. *American Naturalist*, **166**, 216-230.
- 618 Kembel, S. W., de Kroon, H., Cahill, J. F. & Mommer, L. (2008) Improving the scale and precision of  
619 hypotheses to explain root foraging ability. *Annals of Botany*, **101**, 1295-1301.
- 620 Křivan, V., Cressman, R. & Schneider, C. (2008) The ideal free distribution: A review and synthesis of the  
621 game-theoretic perspective. *Theoretical Population Biology*, **73**, 403-425.
- 622 Laird, R. A. & Aarssen, L. W. (2005) Size inequality and the tragedy of the commons phenomenon in  
623 plant competition. *Plant Ecology*, **179**, 127-131.
- 624 Lajeunesse, M. J. (2015) Bias and correction for the log response ratio in ecological meta-analysis.  
625 *Ecology*, **96**, 2056-2063.
- 626 Lakatos, I. (1978) *The methodology of scientific research programmes, philosophical papers volume 1*.  
627 Cambridge University Press, New Jersey, New York, USA.
- 628 Litav, M. & Harper, J. L. (1967) A method for studying spatial relationships between root systems of 2  
629 neighbouring plants. *Plant and Soil*, **26**, 389-392.
- 630 Luysaert, S., Inglima, I., Jung, M., Richardson, A. D., Reichstein, M., Papale, D., Piao, S. L., Schulzes, E. D.,  
631 Wingate, L., Matteucci, G., Aragao, L., Aubinet, M., Beers, C., Bernhofer, C., Black, K. G., Bonal,  
632 D., Bonnefond, J. M., Chambers, J., Ciais, P., Cook, B., Davis, K. J., Dolman, A. J., Gielen, B.,  
633 Goulden, M., Grace, J., Granier, A., Grelle, A., Griffis, T., Grunwald, T., Guidolotti, G., Hanson, P.  
634 J., Harding, R., Hollinger, D. Y., Hutrya, L. R., Kolar, P., Kruijt, B., Kutsch, W., Lagergren, F., Laurila,  
635 T., Law, B. E., Le Maire, G., Lindroth, A., Loustau, D., Malhi, Y., Mateus, J., Migliavacca, M.,  
636 Misson, L., Montagnani, L., Moncrieff, J., Moors, E., Munger, J. W., Nikinmaa, E., Ollinger, S. V.,  
637 Pita, G., Rebmann, C., Rouspard, O., Saigusa, N., Sanz, M. J., Seufert, G., Sierra, C., Smith, M. L.,  
638 Tang, J., Valentini, R., Vesala, T. & Janssens, I. A. (2007) Co2 balance of boreal, temperate, and  
639 tropical forests derived from a global database. *Global Change Biology*, **13**, 2509-2537.
- 640 Lyons, L. (2013) Discovering the significance of 5 sigma. *arXiv*, 1310.1284.
- 641 McNickle, G. G. (in press) Interpreting plant root responses to nutrients, neighbours and pot volume  
642 depends on researchers' assumptions. *Functional Ecology*.
- 643 McNickle, G. G. & Brown, J. S. (2014) An ideal free distribution explains the root production of plants  
644 that do not engage in a tragedy of the commons game. *Journal of Ecology*, **102**, 963-971.
- 645 McNickle, G. G., Deyholos, M. K. & Cahill, J. F. (2016) Nutrient foraging behaviour of four co-occurring  
646 perennial grassland plant species alone does not predict behaviour with neighbours. *Functional  
647 Ecology*, **30**, 420-430.
- 648 McNickle, G. G., Guinel, F. C., Sniderhan, A. E., Wallace, C. A., McManus, A. S., Fafard, M. M. & Baltzer, J.  
649 L. (2020) The benefits of mycorrhizae are frequency-dependent: A case study with a non-  
650 mycorrhizal mutant of *pisum sativum*. *bioRxiv*, 2020.09.08.288084.
- 651 Meier, I. C., Angert, A., Falik, O., Shelef, O. & Rachmilevitch, S. (2013) Increased root oxygen uptake in  
652 pea plants responding to non-self neighbors. *Planta*, **238**, 577-586.
- 653 Mommer, L., Wagemaker, C. A. M., De Kroon, H. & Ouborg, N. J. (2008) Unravelling below-ground plant  
654 distributions: A real-time polymerase chain reaction method for quantifying species proportions  
655 in mixed root samples. *Molecular Ecology Resources*, **8**, 947-953.

- 656 Moonesinghe, R., Khoury, M. J. & Janssens, A. C. J. W. (2007) Most published research findings are  
657 false—but a little replication goes a long way. *PLOS Medicine*, **4**, e28.
- 658 Murphy, G. P. & Dudley, S. A. (2007) Above- and below-ground competition cues elicit independent  
659 responses. *Journal of Ecology*, **95**, 261-272.
- 660 Murphy, G. P. & Dudley, S. A. (2009) Kin recognition: Competition and cooperation in impatiens  
661 (balsaminaceae). *American Journal of Botany*, **96**, 1990-1996.
- 662 Norby, R. J. & Zak, D. R. (2011) Ecological lessons from free-air co<sub>2</sub> enrichment (face) experiments.  
663 *Annual Review of Ecology, Evolution, and Systematics*, **42**, 181-203.
- 664 O'Brien, E. E., Gersani, M. & Brown, J. S. (2005) Root proliferation and seed yield in response to spatial  
665 heterogeneity of below-ground competition. *New Phytologist*, **168**, 401-412.
- 666 Padilla, F. M., Mommer, L., de Caluwe, H., Smit-Tiekstra, A. E., Wagemaker, C. A. M., Ouborg, N. J. & de  
667 Kroon, H. (2013) Early root overproduction not triggered by nutrients decisive for competitive  
668 success belowground. *Plos One*, **8**, e55805.
- 669 Parrish, J. A. D. & Bazzaz, F. A. (1976) Underground niche separation in successional plants. *Ecology*, **57**,  
670 1281-1288.
- 671 Pashler, H. & Wagenmakers, E. J. (2012) Editors' introduction to the special section on replicability in  
672 psychological science: A crisis of confidence? *Perspectives on Psychological Science*, **7**, 528-530.
- 673 Saltelli, A. & Funtowicz, S. (2017) What is science's crisis really about? *Futures*, **91**, 5-11.
- 674 Schenk, H. J., Callaway, R. M. & Mahall, B. E. (1999) Spatial root segregation: Are plants territorial?  
675 *Advances in Ecological Research, Vol 28*, **28**, 145-180.
- 676 Semchenko, M., Saar, S. & Lepik, A. (2014) Plant root exudates mediate neighbour recognition and  
677 trigger complex behavioural changes. *New Phytologist*, **204**, 631-637.
- 678 Smyeka, J. & Herben, T. (2017) Phylogenetic patterns of tragedy of commons in intraspecific root  
679 competition. *Plant and Soil*, **417**, 87-97.
- 680 Stanley, T. D., Carter, E. C. & Doucouliagos, H. (2018) What meta-analyses reveal about the replicability  
681 of psychological research. *Psychological Bulletin*, **144**, 1325-1346.
- 682 Steidl, R. J., Hayes, J. P. & Schaubert, E. (1997) Statistical power analysis in wildlife research. *Journal of*  
683 *Wildlife Management*, **61**, 270-279.
- 684 Van 't Veer, A. E. & Giner-Sorolla, R. (2016) Pre-registration in social psychology—a discussion and  
685 suggested template. *Journal of Experimental Social Psychology*, **67**, 2-12.
- 686 Vellend, M., Baeten, L., Myers-Smith, I. H., Elmendorf, S. C., Beauséjour, R., Brown, C. D., De Frenne, P.,  
687 Verheyen, K. & Wipf, S. (2013) Global meta-analysis reveals no net change in local-scale plant  
688 biodiversity over time. *Proceedings of the National Academy of Sciences*, **110**, 19456-19459.
- 689 Wagenmakers, E.-J., Wetzels, R., Borsboom, D. & van der Maas, H. L. J. (2011) Why psychologists must  
690 change the way they analyze their data: The case of psi: Comment on bem (2011). *Journal of*  
691 *Personality and Social Psychology*, **100**, 426-432.
- 692 Zhang, D. Y., Sun, G. J. & Jiang, X. H. (1999) Donald's ideotype and growth redundancy: A game  
693 theoretical analysis. *Field Crops Research*, **61**, 179-187.

694

695

696 **TABLE 1:** Summary of methodological differences among experiments 1-4. Throughout most of the  
697 paper we refer to the experiments by the media type.

|                             | <b>Experiment 1</b>   | <b>Experiment 2</b>     | <b>Experiment 3</b>        | <b>Experiment 4</b>        |
|-----------------------------|-----------------------|-------------------------|----------------------------|----------------------------|
| <b>Timing</b>               | Spring 2016           | Autumn 2016             | Winter 2017                | Autumn 2018                |
| <b>Media type</b>           | 100% Soil             | 50% soil<br>50% gravel  | 100% gravel                | 100% Vermiculite           |
| <b>Plant support</b>        | Stakes                | Stakes and Bird netting | Stakes and ties            | Stakes and ties            |
| <b>Watering Schedule</b>    | Every other week      | Every other week        | Weekly                     | Weekly                     |
| <b>Nutrient Application</b> | ¼ g/L nutrients twice | None                    | ½ g/L nutrients four times | ½ g/L nutrients four times |

698

699 **TABLE 2:** ANOVA tables for the GLMMs on the biomass production of different plant tissues across  
 700 neighbour addition treatments in experiments 1-4. Statistical significance at the  $\alpha = 0.05$  level is  
 701 marked with \* and bold face font. Denominator degrees of freedom (Den. df) were estimated using  
 702 Satterthwaite's method.

| Tissue                               | Experiment            | Num. df | Den. df | F    | p              |
|--------------------------------------|-----------------------|---------|---------|------|----------------|
| <b>Root</b>                          | <b>1. Soil</b>        | 3       | 40.96   | 1.04 | 0.3852         |
|                                      | <b>2. Soil-gravel</b> | 3       | 42.00   | 2.65 | 0.0611         |
|                                      | <b>3. gravel</b>      | 3       | 55.00   | 1.03 | 0.388          |
|                                      | <b>4. Vermiculite</b> | 3       | 33.04   | 1.52 | 0.2276         |
| <b>Stem</b>                          | <b>1. Soil</b>        | 3       | 41.46   | 1.57 | 0.2103         |
|                                      | <b>2. Soil-gravel</b> | 3       | 49.00   | 3.06 | <b>0.0368*</b> |
|                                      | <b>3. gravel</b>      | 3       | 56.00   | 0.84 | 0.4761         |
|                                      | <b>4. Vermiculite</b> | 3       | 34.64   | 1.19 | 0.3268         |
| <b>Leaf</b>                          | <b>1. Soil</b>        | 3       | 41.01   | 0.87 | 0.4642         |
|                                      | <b>2. Soil-gravel</b> | 3       | 49.00   | 2.43 | 0.0762         |
|                                      | <b>3. gravel</b>      | 3       | 56.00   | 3.4  | <b>0.0237*</b> |
|                                      | <b>4. Vermiculite</b> | 3       | 34.98   | 1.09 | 0.3666         |
| <b>Fruit</b>                         | <b>1. Soil</b>        | 3       | 41.46   | 2.02 | 0.1259         |
|                                      | <b>2. Soil-gravel</b> | 3       | 38.6    | 0.71 | 0.5497         |
|                                      | <b>3. gravel</b>      | 3       | 42.00   | 2.79 | 0.0523         |
|                                      | <b>4. Vermiculite</b> | 3       | 35.1    | 1.66 | 0.1939         |
| <b>Shoot =<br/>(Leaf +<br/>Stem)</b> | <b>1. Soil</b>        | 3       | 41.24   | 1.25 | 0.3039         |
|                                      | <b>2. Soil-gravel</b> | 3       | 49.00   | 2.68 | 0.0562         |
|                                      | <b>3. gravel</b>      | 3       | 56.00   | 2.47 | 0.0715         |
|                                      | <b>4. Vermiculite</b> | 3       | 34.91   | 1.11 | 0.3561         |

703

704

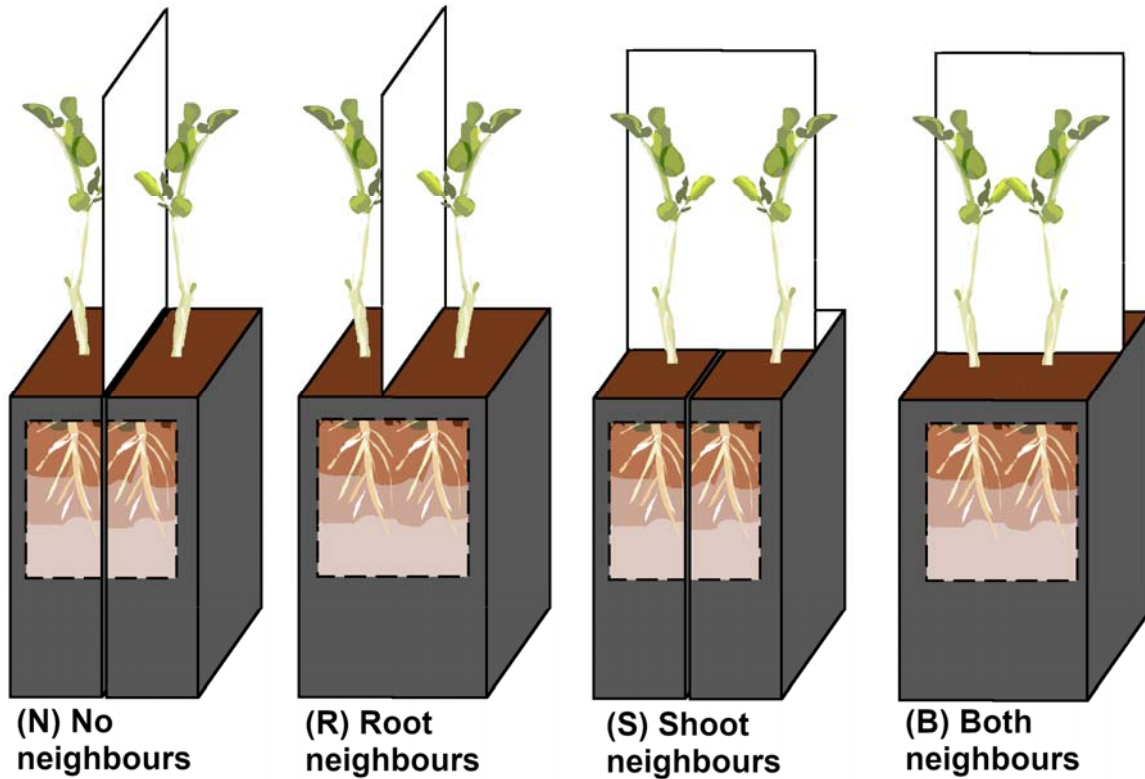

706 **FIGURE 1:** Schematic representation of the experimental design used to separate root and shoot  
707 competition. Dividers were placed between plants either above or belowground to create four  
708 treatments that included: (N) no interaction with neighbours; (R) only root interactions with neighbours;  
709 (S) only shoot interactions with neighbours, or; (B) both root and shoot interactions with neighbours.  
710 Image is not to scale, see methods for dimensions of pots and dividers.

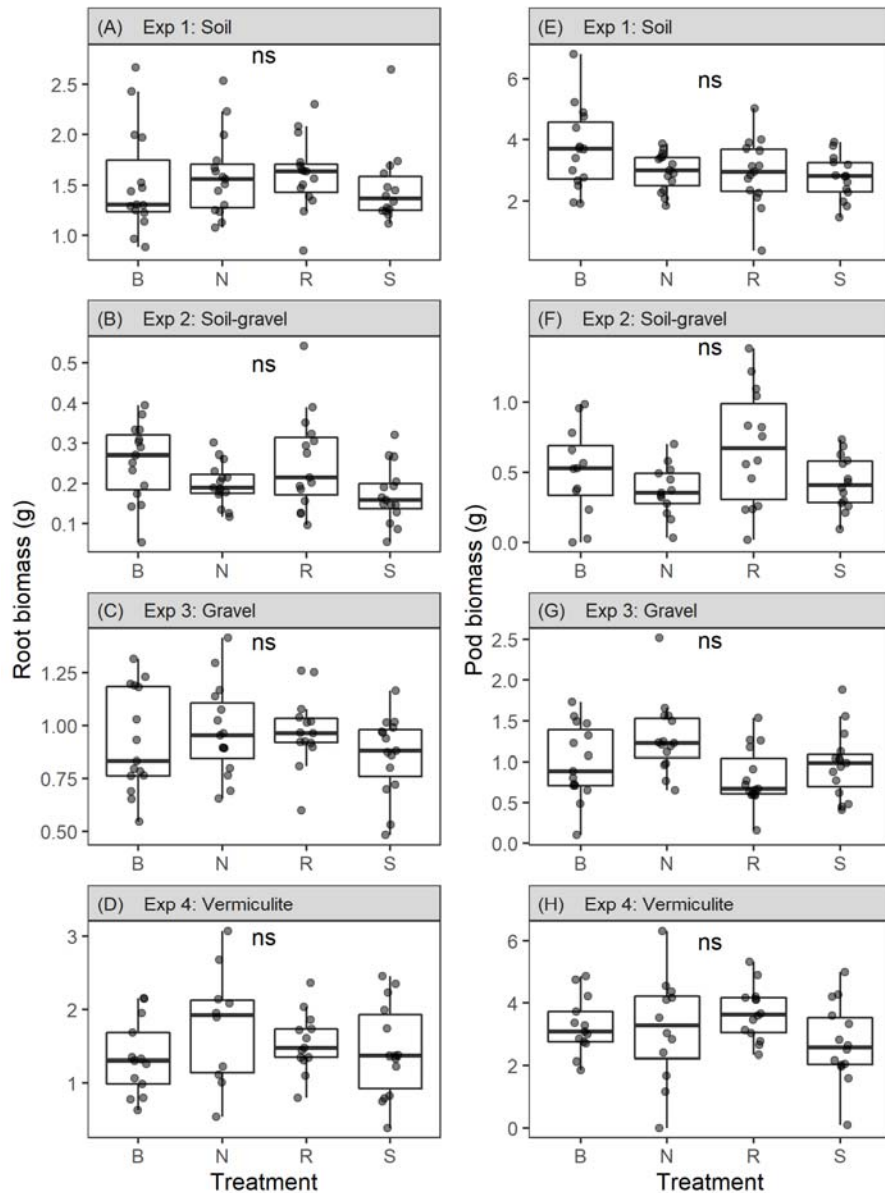

711

712 **FIGURE 2:** Results of root (A-D) and pod biomass (E-H) production across the four experiments as a test  
713 of different theories of root production in response to neighbours above and below ground. Treatment  
714 codes refer to both root and shoot interactions (B), no interactions (N), root interaction only (R), or  
715 shoot interactions only (S). The code ns indicates lack of statistical significance in GLMMs which supports  
716 the IFD model, and rejects the root under- or over-proliferation hypotheses (Table 2).

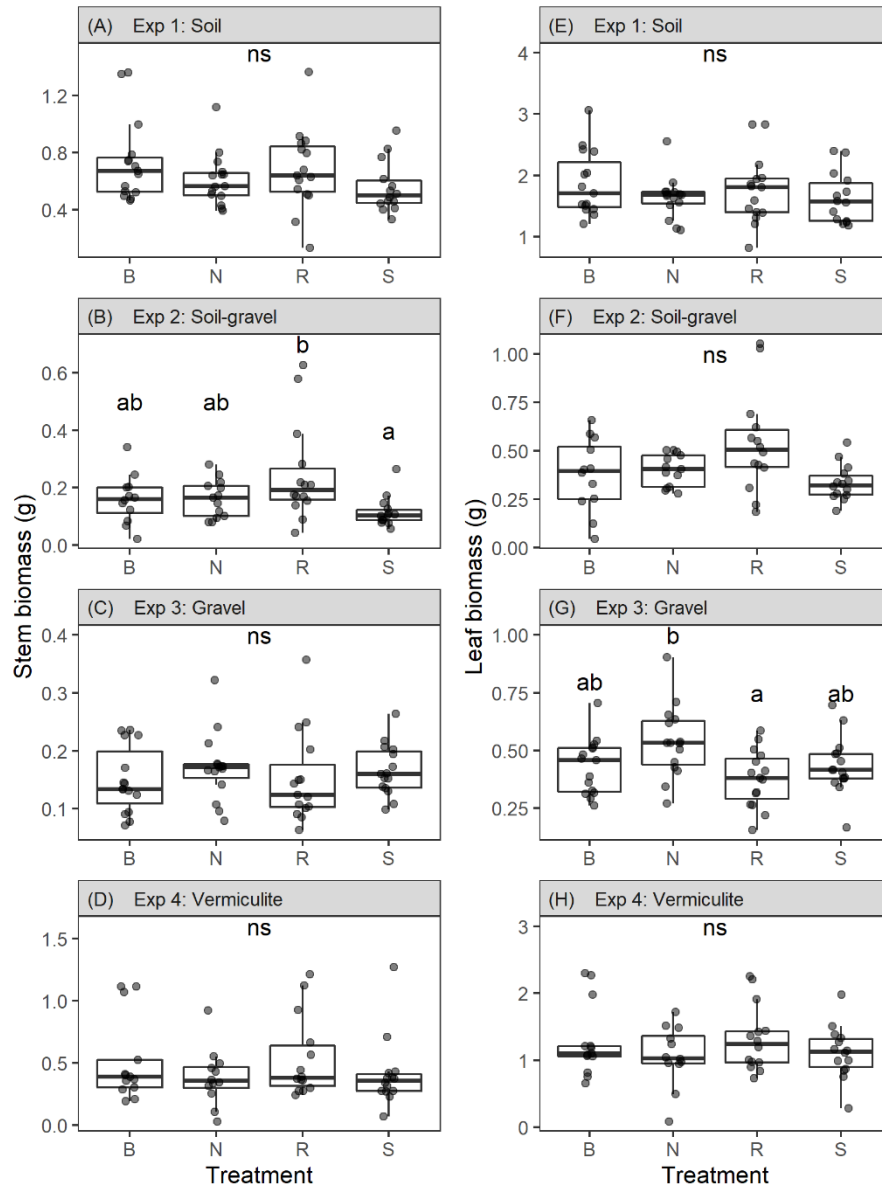

717

718 **FIGURE 3:** Results of stem and leaf production in response to neighbours either above or below ground.

719 Most root based theories make no specific predictions about above ground growth. Treatment codes

720 refer to both root and shoot interactions (B), no interactions (N), root interaction only (R), or shoot

721 interactions only (S). The label *ns* indicates lack of statistical significance at the  $\alpha = 0.05$  level in

722 GLMMs, while lower case letters indicate post-hoc comparisons of differences among treatments at this

723  $\alpha = 0.05$  level (Table 2).

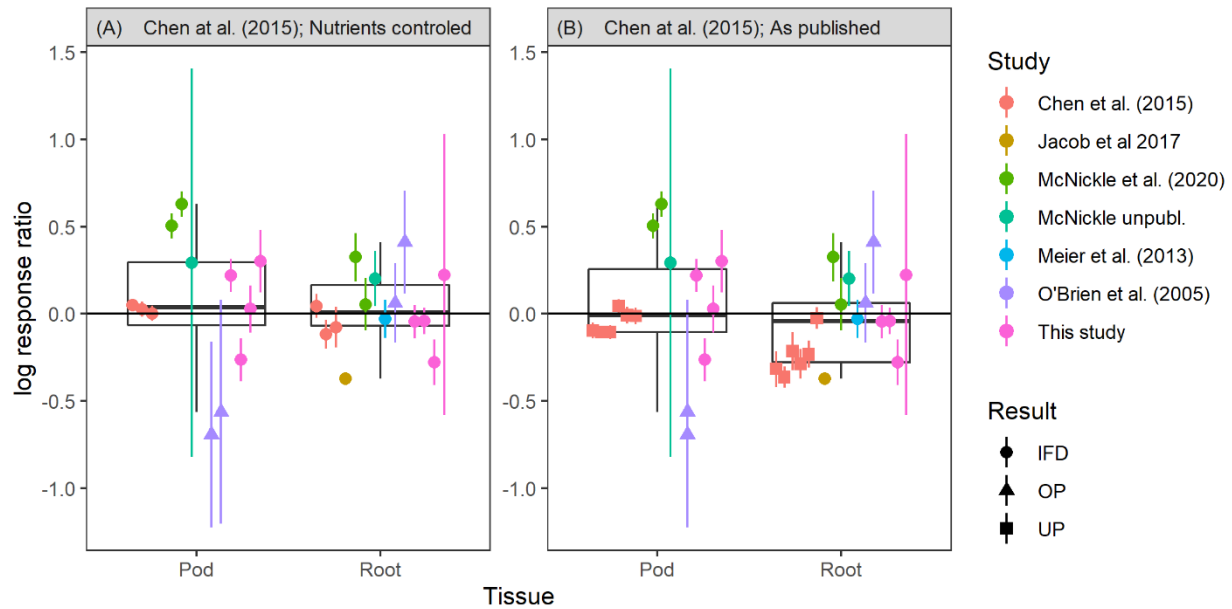

724

725 **FIGURE 4:** Summary of all available studies of pea responses to the presence of below ground  
726 neighbours. (A) results plotted with Chen et al. (2015) data analysed with nutrients controlled rather  
727 than pot volume. (B) results plotted with Chen et al. (2015) data presented as published, with pot  
728 volume controlled rather than nutrients. The log response ratio is the natural log of the biomass with  
729 neighbours to alone. Positive values for roots indicate support for the over-proliferation (OP)  
730 hypothesis, negative values support the under-proliferation (UP) hypothesis, and values equal to zero  
731 support the IFD hypothesis. The shape of each point represents the original conclusion (Result) of the  
732 published study, colour represents the reference of the original study, and error bars are 1 standard  
733 deviation of the log response ratio (which was not available for all studies).

734



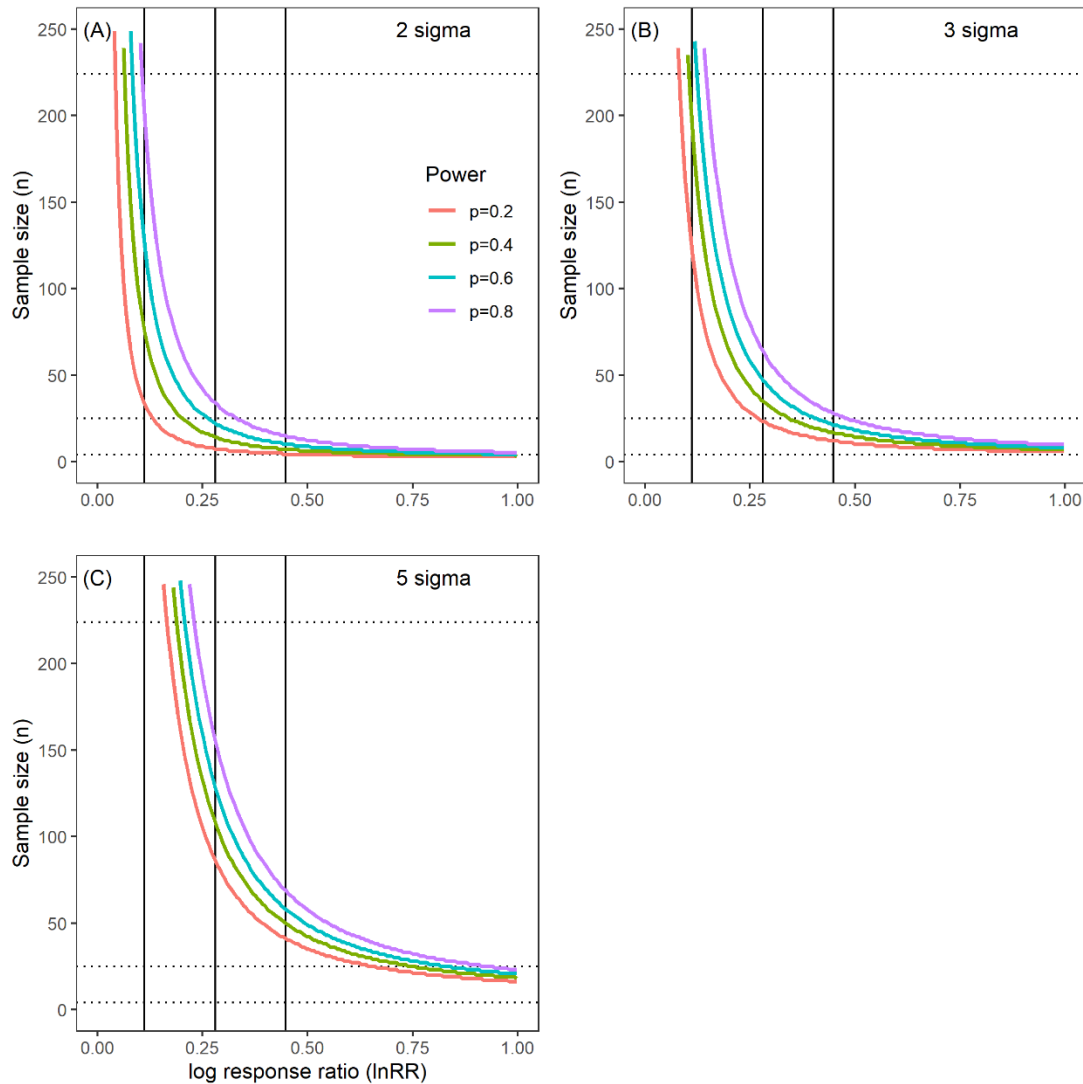

735

736 **FIGURE 5:** Power analysis for statistical significance using a different willingness to make a type I error:  
737 (A) 2 sigma, i.e. a 1 in 20 type I error rate, (B) 3 sigma, i.e. a 1 in 370 type I error rate and (C) five sigma,  
738 i.e. a 1 in 3.5million type I error rate. Coloured lines represent different levels of statistical power, that  
739 is, the ability to correctly reject a false null and avoid Type II statistical error. Horizontal dotted lines  
740 represent the minimum (n=4), and maximum (n=25) published sample sizes for pea, and n=224 the total  
741 number of replicates across the literature. Vertical lines represent conventional small, medium and high  
742 effect sizes from left to right respectively.
